# Supplementary material for: Intranasal analgesia for acute moderate to severe pain in children – a systematic review and meta-analysis
Source: PubMed Central journal article supplement (PMC10436645; doi:10.1186/s12887-023-04203-x), 2023-08-18
Supplement: 12887_2023_4203_MOESM5_ESM.pdf [file 12887_2023_4203_MOESM5_ESM.pdf]

| Ongoing studies – intranasal analgesia for acute pain in children |                                                                                                                                                                                                                                                                                                                       |
|-------------------------------------------------------------------|-----------------------------------------------------------------------------------------------------------------------------------------------------------------------------------------------------------------------------------------------------------------------------------------------------------------------|
| Identifier                                                        | Description                                                                                                                                                                                                                                                                                                           |
| NCT02985177                                                       | A RCT of a combination of analgesics for pain management in children with a suspected fracture (CAST).<br>Status: Unknown. Not yet recruiting September 20 <sup>th</sup> 2018.<br>INF + Oral hydromorphone vs. INF + Oral ibuprofen.                                                                                  |
| NCT02573714                                                       | Sub dissociative Intranasal ketamine for pediatric sickle cell pain crises<br>Status: unknown. Recruiting March 14 <sup>th</sup> 2019.<br>INK vs. Standard pain therapy.                                                                                                                                              |
| NCT00882960                                                       | Intranasal Fentanyl for Pain Management<br>Status: unknown. Recruiting May 4 <sup>th</sup> 2011.<br>INF vs. IVF.                                                                                                                                                                                                      |
| NCT05057689                                                       | Safety and efficacy of intranasal dexmedetomidine, fentanyl and midazolam in the pediatric emergency room.<br>Status: Not yet recruiting March 3 <sup>rd</sup> 2022.<br>IN dexmedetomidine vs. INF vs. IN midazolam.                                                                                                  |
| NCT03950817                                                       | Nebulized Sub-dissociative                                                                                                                                                                                                                                                                                            |
| IRCT20111114008104N15                                             | Comparison of analgesic effects and morphine consumption of intravenous morphine sulfate and intranasal dexmedetomidine with intravenous morphine sulfate in patients with extremity fractures presented in emergency departments<br>Status: Recruitment complete January 2nd 2019.<br>IN Dexmedetomidine+IVM vs. IVM |
