# Supplementary material for: Intranasal analgesia for acute moderate to severe pain in children – a systematic review and meta-analysis
Source: PubMed Central journal article supplement (PMC10436645; doi:10.1186/s12887-023-04203-x), 2023-08-18
Supplement: 12887_2023_4203_MOESM7_ESM.pdf [file 12887_2023_4203_MOESM7_ESM.pdf]

### INK vs. INF – Rescue medications

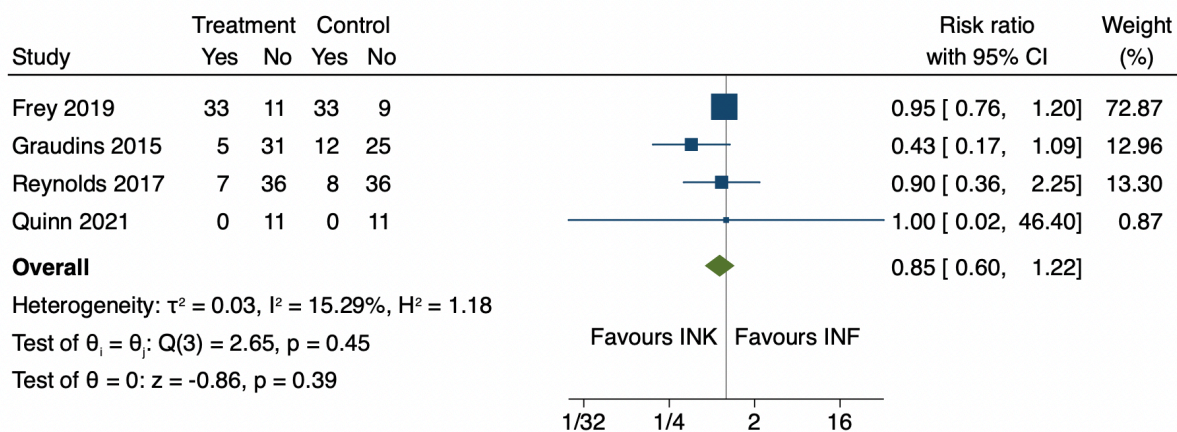

Random-effects REML model
